# Supplementary material
Source: publisher site journal article supplement (https://www.dovepress.com/article/382939)
Supplement: Supplementary file 1 [file get_supplementary_file.php]

## Supplement: Interview Guide

**Guideline for individual interviews for the study "Contributions of an interprofessional quality circle for improving the quality of general medical teaching in Germany".**

Version: 18.12.2018

| **I. Introduction** |
| --- |
| Introduction of the doctoral student, explanation of the purpose of the study, reference to voluntary nature, recording and data protection and anonymised publication of the data in specialist journals. |
| Explanation of the interview procedure |
| **II. Entry Questions / Warm-Up** |
| What experiences do you have with the topic of quality assurance in general medical teaching? |
| You dealt with the topic XY in the last meeting of the quality circle. How was the topic XY dealt with in the quality circle? |
| **III. Main Questions** |
| How do you get involved in the quality circle? |
| How do the participants work together? |
| How would you describe the process of a Quality Circle meeting? |
| What happens between the sessions? |
| What contributes to a successful session? |
| How do you describe the outcome of the work in the last session? |
| What has changed about the Quality Circle since you first participated? |
| How do you describe the effect of the Quality Circle on general medical teaching? |
| **IV. Final Question / Wrap-Up** |
| What else would you like to tell me in this context? |

Thank you for participating!
